1 **Uncovering Additional Predictors of Urothelial Carcinoma from Voided Urothelial Cell**  
2 **Clusters Through a Deep Learning Based Image Preprocessing Technique**

3  
4 Joshua J. Levy PhD<sup>1,2,3,4,\*</sup>, Xiaoying Liu MD<sup>1,6</sup>, Jonathan D. Marotti MD<sup>1,6</sup>, Darcy A. Kerr  
5 MD<sup>1,6</sup>, Edward J. Gutmann MD, AM<sup>1,6</sup>, Ryan E. Glass MD<sup>5</sup>, Caroline P. Dodge<sup>6</sup>, Arief A.  
6 Suriawinata MD<sup>1,6</sup>, Louis J. Vaickus MD, PhD<sup>1,6</sup>

- 7 1. Emerging Diagnostic and Investigative Technologies, Department of Pathology and  
8 Laboratory Medicine, Dartmouth Hitchcock Medical Center, Lebanon, NH, 03766
- 9 2. Department of Dermatology, Dartmouth Hitchcock Medical Center, Lebanon, NH, 03766
- 10 3. Department of Epidemiology, Dartmouth College Geisel School of Medicine, Hanover,  
11 NH, 03756
- 12 4. Program in Quantitative Biomedical Sciences, Dartmouth College Geisel School of  
13 Medicine, Hanover, NH, 03756
- 14 5. UPMC East, Pittsburg, PA, 15146
- 15 6. Dartmouth College Geisel School of Medicine, Hanover, NH, 03756

16  
17 \* To whom correspondence should be addressed: [joshua.j.levy@dartmouth.edu](mailto:joshua.j.levy@dartmouth.edu)

18  
19 **Author Contributions**

20 JL and LV: conceptualization, formal analysis, funding acquisition, investigation, methodology,  
21 project administration, resources, software, supervision, validation, visualization, writing -  
22 original draft; XL, JM, DK, EG, RG, CD, LV: data curation; all authors: writing - review and  
23 editing

24 **Abstract**

25 Urine cytology is commonly used as a screening test for high grade urothelial carcinoma for  
26 patients with risk factors or hematuria and is an essential step in longitudinal monitoring of  
27 patients with a prior bladder cancer history. However, the semi-subjective nature of current  
28 reporting systems for urine cytology (e.g., The Paris System) can hamper reproducibility. For  
29 instance, the incorporation of urothelial cell clusters into the classification schema is still an item  
30 of debate and perplexity amongst expert cytopathologists, as several previous works have  
31 disputed their diagnostic relevance. Recently, several machine learning and morphometric  
32 algorithms have been proposed to provide quantitative descriptors of urine cytology specimens in  
33 an effort to reduce subjectivity and include automated assessments of cell clusters. However, it  
34 remains unclear how these computer algorithms interpret/analyze cell clusters. In this work, we  
35 have developed an automated preprocessing tool for urothelial cell cluster assessment that  
36 divides urothelial cell clusters into meaningful components for downstream assessment (i.e.,  
37 population-based studies, workflow automation). Results indicate that cell cluster atypia (i.e.,  
38 defined by whether the cell cluster harbored multiple atypical cells, thresholded by a minimum  
39 number of cells), cell border overlap and smoothness, and total number of clusters are important  
40 markers of specimen atypia when considering assessment of urothelial cell clusters. Markers  
41 established through techniques to separate cell clusters may have wider applicability for the  
42 design and implementation of machine learning approaches for urine cytology assessment.

43  
44  
45  
46

## 47 **Introduction**

48 Urine cytology (UC) specimens are essential for bladder cancer detection and screening yet are  
49 challenging to assess given the complexity of the specimen. Screening is often accomplished  
50 through application of The Paris System (TPS) criteria, which assigns four main ordered  
51 categories (negative, atypical urothelial cells, suspicious for high grade urothelial carcinoma,  
52 positive for high-grade urothelial carcinoma, HGUC) based on the following criteria for a  
53 positive diagnosis: 1) at least 5 malignant urothelial cells, 2) a nuclear-to-cytoplasm (NC) ratio  
54 at or above 0.7, 3) nuclear hyperchromasia, 4) markedly irregular nuclear membrane, and 5)  
55 coarse/clumped chromatin<sup>1,2</sup>. Specimens with definitive diagnoses (negative, positive) are often  
56 easier to assess than atypical (hedged against negative diagnosis) and suspicious (hedged against  
57 positive diagnosis; less than five malignant cells needed) specimens. Predictably, these two  
58 indeterminate diagnoses are hindered by poor interobserver variability as compared to negative  
59 or positive diagnoses<sup>3-5</sup>.

60  
61 TPS does not explicitly establish urothelial cell clusters as separate assessment criteria for the  
62 final cytologic diagnosis. Instead, clusters are judged by their constituent cells, where  
63 cytomorphological assessments for each cell in the cluster must satisfy atypical criteria and  
64 combined with the individual cell assessments. However, the significance of cell clusters for  
65 urothelial cancer has not been fully elucidated. Whether and how urothelial clusters are assessed  
66 during bladder cancer screening potentially impacts diagnostic reproducibility. Several studies  
67 have found no association between number and type of cell cluster and urothelial carcinoma,  
68 whereas others have demonstrated a statistically significant positive association between the  
69 number of clusters and urothelial carcinoma<sup>2,6-10</sup>. One such study established three architectural

70 types of urothelial cell clusters: 1) non-overlapping cells, 2) overlapping cells, densely packed,  
71 lacking distinguishable cell borders (dense regions), and 3) overlapping cells with  
72 distinguishable cell borders<sup>6</sup>. While the study authors were able to identify that the number of  
73 clusters, irrespective of cluster type, were associated with specimen atypia, presence of urothelial  
74 carcinoma was not associated with any cluster type alone. As another example, tissue fragments  
75 and papillary clusters with a fibrovascular core as an indication for urothelial carcinoma (i.e.,  
76 low-grade carcinoma) yet are rare. Presence and type of cell clusters and tissue fragments in  
77 urine specimens may also be an artifact of specimen preparation (e.g., ThinPrep® associated  
78 with higher presence of clusters), previous reports of tissue biopsy, urothelial stones, etc., all of  
79 which potentially impact exfoliation of cell clusters. Specimens containing cell clusters are  
80 typically classified as atypical, favor reactive or low grade urothelial neoplasm diagnosis, even  
81 without the fibrovascular core<sup>2</sup>. Previous studies have deemphasized the diagnostic utility of  
82 urothelial clusters in favor of individual cell analysis<sup>8,11,12</sup>. However, prevalent diagnostic  
83 criteria have been established almost exclusively based on inspection of voided specimens, while  
84 significant differences have been documented between types of specimen preparation (e.g.,  
85 cystoscopic, voided, upper tract, instrumented, neobladder, etc.).

86

87 Several computational, image analysis and machine learning methods have been developed to  
88 quantitatively assess urine cytology specimens to generate an automated summary<sup>13-21</sup>. In brief,  
89 these methods can parse digitized representations of cytology slides (Whole Slide Images; WSI)  
90 into their constituent cellular components. Parsed cells are independently assessed using  
91 morphometric and machine learning approaches to quantify features of atypia (e.g., NC ratio,  
92 hyperchromasia, clumped chromatin, etc.). Features are then tabulated across all cells in the slide

93 to measure the overall atypia burden of the specimen in order to predict the presence of high-  
94 grade urothelial carcinoma. Automation tools for urine cytology could provide both rapid and  
95 objective screening and have the potential to improve diagnostic accuracy and disease  
96 management by assessing every cell in a given specimen, a prescreening task normally assigned  
97 to cytotechnicians prior to final assessment from the cytopathologist<sup>22</sup>. Cytotechnologists,  
98 although ostensibly expected to screen every cell on a given slide, realistically do not perform  
99 such an exhaustive assessment. As compared to cytopathologists, they perform a more  
100 regimented screening, combining single cell assessment and gestalt impressions over the entire  
101 slide area.

102

103 While existing image assessment techniques have either uncovered new or recapitulated  
104 previously known specimen malignancy predictors, the handling of clusters is still inadequately  
105 addressed. For instance, a previous machine learning technique used density-based clustering  
106 methods to identify cell clusters, which were then validated using a neural network. However,  
107 the sensitivity and specificity of the clustering method for identifying cell clusters was not  
108 validated in the paper and information was not explicitly provided on how clusters factored into  
109 the final assessment other than to report the number of clusters in the specimen<sup>13</sup>. In addition,  
110 associations between cluster scores and outcomes were not made available. Another technique  
111 used nucleus-centric watershed-based methods to segment urothelial cells for the calculation of a  
112 cluster-specific NC ratio<sup>14</sup>. Such techniques assume cell borders do not overlap and may provide  
113 imprecise atypia estimates. Furthermore, the performance of the water shedding technique to  
114 delineate urothelial cells from other cell types in the cluster was not discussed. Nonetheless,  
115 these methods present a significant advancement from previous modes of assessment.

116

117 In this study, we detail the development of an Artificial Intelligence (AI) tool for urothelial cell  
118 cluster analysis that can accurately localize urothelial cells, overlapping cell boundaries, dense  
119 regions of significant overlap and identify visual markers of urothelial atypia. By breaking  
120 clusters into their constituent architectural components <sup>6</sup> and isolating cells with overlapping cell  
121 borders, this preprocessing tool can facilitate downstream association studies and development of  
122 predictive algorithms that explicitly incorporate cluster architecture and assess the  
123 cytomorphology of overlapping cells for atypia. As a demonstration of this approach, we use our  
124 tool to associate the quantitative cluster-level features with high-grade urothelial carcinoma. The  
125 goal of this work was to build more precise quantitative descriptors of urine clusters. In the  
126 future, we plan to use the cluster tool as a preprocessing mechanism for an automated workflow  
127 that enables rapid screening of all types of cytology specimens.

128

129

130 **Methods**

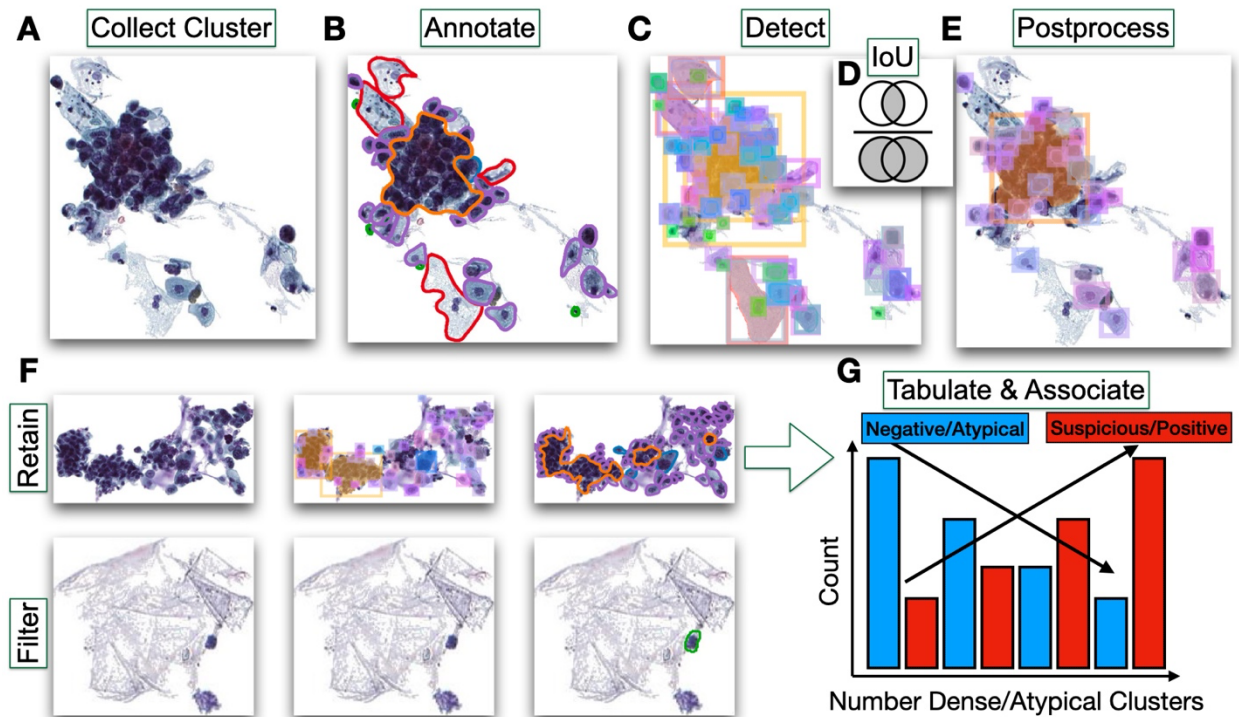

131  
 132 **Figure 1: Methods Overview:** **A)** Training, validation and internal test set clusters are collected  
 133 and **B)** annotated for squamous (red), inflammatory (green), negative urothelial cell (purple),  
 134 atypical urothelial cell (blue), and dense regions (orange); **C)** Cell border detection model  
 135 identifies candidate cells cytoplasmic borders within cluster; **D)** significantly overlapping cells  
 136 types, as defined by their intersection over union (IoU), are **E)** filtered by their objectiveness  
 137 score (e.g., squamous cell predicted in same area as urothelial cell but with higher score) and  
 138 remaining predicted squamous and inflammatory cells are additionally removed to reveal  
 139 negative and atypical urothelial cells and dense regions of urothelial cells; **F)** urothelial clusters  
 140 are called if the number of remaining elements exceed the *minimum cell number*; **G)** number of  
 141 clusters (urothelial, atypical, dense) are totaled per specimen and totals are then tabulated across  
 142 the specimens to reveal associations with UC atypia

143  
 144 **Data Collection and Image Scanning**

145 We collected 1,277 urine specimens across 141 patients from 2008 to 2019 at our institution,  
 146 Dartmouth-Hitchcock Medical Center (DHMC). Specimens were prepared through ThinPrep®  
 147 and Pap-staining prior to microscopic examination. Urine slides were scanned using a Leica  
 148 Aperio-AT2 scanner at 40x resolution and stored as full-resolution SVS files representing WSI.

149

150 **Annotation of Cell Clusters for Training, Validation and Internal Test Set**

151 Candidate cell clusters were separated from background in each WSI through a connected  
152 components analysis that assigns each cell/cluster a separate identifier. For each cell/cluster,  
153 remaining background was masked out and images of each candidate cluster were stored as  
154 PNG/TIFF files (**Figure 1A**). Candidate cell clusters were subsequently filtered based on cluster  
155 size and number of predicted nuclei using an updated version of a previously developed nuclei  
156 segmentation tool configured for NC ratio estimation<sup>14</sup>. Two cytopathologists (LJV and XL)  
157 were presented with 800 candidate cluster images for annotation that were not utilized for held-  
158 out evaluation. Of the 800 candidate clusters, 633 were confirmed urothelial clusters. The  
159 cytopathologists annotated each of these cell clusters by outlining all cell boundaries, where  
160 possible, and individual cells were assigned to the following classes: 1) squamous (red), 2)  
161 inflammatory (green), 3) negative urothelial cell (purple), 4) atypical urothelial cell (blue), and 5)  
162 dense regions of overlapping yet indistinguishable cell borders (orange) which were circled as a  
163 group by the cytopathologist (**Figure 1B**). Of the images used to develop the urothelial cell  
164 cluster algorithm, 474 clusters were partitioned to the training/validation dataset and 159 clusters  
165 served as the internal test set, corresponding to a total 8,123 cells annotated (**Table 1**). Both  
166 cytopathologists were given Microsoft Surface tablets and a touch pen to annotate cells, by  
167 circling the cell borders and tagging with the relevant cell type / architecture as aforementioned.  
168 Note that cell boundaries were annotated here, which is entirely different from the task of  
169 annotating cell nuclei. Annotation of cell borders was done using ASAP software  
170 (<https://computationalpathologygroup.github.io/ASAP/>).

171  
172 **Table 1: Break down of training/validation and internal test set clusters;** by number of  
173 clusters and number of annotations for each cell type across clusters

| Cell Type Annotated      | Training/Validation Sets | Internal Test Set |
|--------------------------|--------------------------|-------------------|
| Negative Urothelial Cell | 4050                     | 1546              |
| Atypical Urothelial Cell | 568                      | 144               |



|                              |      |      |
|------------------------------|------|------|
| <b>Dense Architecture</b>    | 203  | 83   |
| <b>Squamous Cells</b>        | 724  | 231  |
| <b>Inflammatory Cells</b>    | 459  | 115  |
| <b>Total Cells Annotated</b> | 6004 | 2119 |
| <b>Total Clusters</b>        | 474  | 159  |

174

## 175 **Object Detection Model Training and Postprocessing for Training/Validation Clusters**

176 For each candidate cell cluster, we aimed to localize individual cells (squamous, inflammatory,  
177 negative/atypical urothelial cells) and cluster architectures (dense regions of overlapping  
178 urothelial cells without smooth cell borders), while locating the cell borders, even if overlapping.  
179 We were able to accomplish this aim through training of an object detection neural network<sup>23–26</sup>.  
180 In brief, this neural network simultaneously detects multiple objects or *instances* in the image by  
181 proposing and filtering regions of interest (i.e., boxes), providing an “objectness” score between  
182 0-1 that ascribes confidence in its prediction, then “tags” each object dynamically with the  
183 appropriate label, and finally outlines the object borders using a segmentation neural network,  
184 that predicts within the object on a pixel-by-pixel basis the object’s precise boundary (**Figure**  
185 **1C**). In contrast, water shedding and DBSCAN are unable to perform these tasks and lack the  
186 precision required to locate cells/dense architectures which may or may not have overlapping  
187 boundaries. Our object detection network was trained on the training/validation set using the  
188 Detectron2 framework<sup>27</sup>. The model was trained for 1000 epochs using NVIDIA V100 GPUs.  
189 Training images were augmented (e.g., randomly flipped, rotated, resized, color jitter) during  
190 training to improve the model fitness.

191

192 After model training, predicted clusters underwent post-processing to remove potentially  
193 spurious predictions. Briefly, regions of interest for separate objects may overlap, which is  
194 helpful for identifying urothelial cells with overlapping boundaries. However, cell calls with  
195 significant overlap, more so than expected with overlapping cytoplasmic boundaries, were

196 filtered using non-maximum suppression (NMS)<sup>28</sup>, which selects the cell type with the greatest  
197 “objectness score” where two objects overlapped (**Figure 1D-E**). Detected squamous cells and  
198 inflammatory cells were removed during this filtering process to focus the assessment on  
199 urothelial cell atypia and architecture (**Figure 1E**).

200

## 201 **Evaluation of Internal Test Set**

202 Validation of the internal test set clusters were accomplished by calculating concordance  
203 statistics between the cytopathologists’ cellular annotations and the model’s predictions. This  
204 was accomplished in several ways.

205

206 First, we calculated cell-level statistics for the internal test set of clusters: *how well did*  
207 *individually localized cells and dense regions align with the annotations?* To this end, we  
208 calculated the average percentage of urothelial cells per cluster that accurately aligned to ground  
209 truth urothelial cell annotations, as defined by the *intersection over union* (IoU) score (**Figure**  
210 **1D**) to associate each ground truth annotation with the prediction with the greatest overlap. Then,  
211 for each cluster, we merged all detected dense regions and calculated the average IoU between  
212 the predicted and ground truth dense regions, weighted by the size of each dense region, as a  
213 measure of detection accuracy. Finally, we assessed the sensitivity and specificity of the  
214 approach for instances where the detection model may have conflated non-overlapping and  
215 overlapping urothelial cells with dense overlapping regions through cross tabulating predicted  
216 urothelial cells and dense regions with their associated ground truth annotations.

217

218 Aside from ensuring that the cell-level predictions were accurately calibrated, we also sought to  
219 assess cluster level measures (e.g., *does the cluster exhibit cytological and/or architectural*  
220 *atypia?*) for the internal test set. We wanted to evaluate whether these metrics were associated  
221 with urothelial carcinoma assignments across the held-out test WSI. Assuming our cell border  
222 detection tool was well attuned, our tool could estimate associations that are not subject to rater  
223 subjectivity. First, we calculated the number of urothelial cells per cluster, predicted and actual.  
224 We then calculated the spearman's correlation coefficient to measure agreement between the  
225 number of predicted and true urothelial cells per cluster. We additionally measured the ability to  
226 detect a urothelial cluster (as codified by the ability to accurately detect at least 3 urothelial cells)  
227 through calculation of the C-statistic. Similar C-statistics were calculated for the ability to detect  
228 whether the cluster was negative (i.e., at least 3 negative urothelial cells) and atypical (i.e., at  
229 least 3 atypical urothelial cells). Finally, concordance between predicted and ground truth dense  
230 regions were established through calculation of the spearman's correlation coefficient for area  
231 estimates of the dense regions and calculation of the C-statistic for the ability to detect whether  
232 the cluster contained a dense region.

233  
234 We calculated 95% confidence intervals for all cell-level and cluster-level concordance statistics  
235 using 1000-sample non-parametric bootstrapping.

### 236 237 **Curation and Automated Cytological Assessment of Clusters in the Held-Out Test Set**

238 Staff cytopathologists assessed the original urine cytology glass slides for evidence of urothelial  
239 carcinoma. Olympus microscopes were utilized for pathologic examination. Cytology specimens  
240 were assigned primary diagnoses at the time of collection by one of 10 cytopathologists, and

241 secondarily from a reassessment while utilizing The Paris System (TPS) criteria from one of 5  
242 cytopathologists (note: no two cytopathologists assessed the same slide). TPS was officially  
243 adopted by DHMC in 2018, so TPS criteria was applied during reexamination of the specimens.  
244 In order to eliminate confounding from specimen preparation, only voided urine specimens were  
245 considered. Slides that were nondiagnostic were removed from the external assessment, as were  
246 slides that contained scanning artifacts and other artifacts that could impact manual and digital  
247 assessment (e.g., abundant blood, neobladder, etc.). Specimens corresponding to WSI with an  
248 excess of 5 million objects (much of them corresponding to debris) during WSI preprocessing  
249 were removed from the analysis. A representative sample of WSI were selected from this dataset.  
250 We assessed a total of 430 WSI spanning across 105 patients (**Table 2**). All image processing  
251 techniques were implemented in Python v3.7 and large-scale image processing was  
252 accomplished in parallel using high-throughput job submission via the Dartmouth College  
253 Discovery Research Computing Cluster.

254  
255 For each WSI, in contrast to previous works, we included urothelial cell clusters whose predicted  
256 number of urothelial cells surpassed a specific threshold (denoted as *minimum cell number*; a  
257 proxy for the overall sizes of urothelial clusters considered in the analysis) (**Figure 1F**). Clusters  
258 were labeled as *atypical* if they harbored a minimum number of atypical cells (i.e., at least 10%  
259 of the *minimum cell number*). Clusters were labeled as *dense* if they contained a dense region of  
260 overlapping urothelial cells without a definitive cell border. For a given *minimum cell number*,  
261 we tabulated the total number of clusters, atypical clusters, and dense clusters for a given  
262 specimen to form slide-level cluster measures. Based on the cytopathologist's rating, we also  
263 dichotomized whether the specimen was assessed to be high risk (suspicious or positive), which

264 carry certain disease management implications (e.g., ordering of cystoscopy or biopsy for  
265 histological diagnosis), as opposed to low risk (atypical and negative), which may only  
266 necessitate longitudinal follow-up (**Figure 1G**).

267  
268 **Table 2: Breakdown of diagnostic assignments in held-out test set and patient**  
269 **demographics**

| <b>History (%)</b>            | <b>N (%)</b> | <b>Type (%)</b>   | <b>N (%)</b> | <b>Age (Mean (SD))</b>    | <b>73.64 (9.81)</b> |
|-------------------------------|--------------|-------------------|--------------|---------------------------|---------------------|
| <b>Bladder Cancer</b>         | 363 (84.4)   | <b>Negative</b>   | 232 (54.0)   | <b>Number Sex = M (%)</b> | 82 (78.1)           |
| <b>Hematuria</b>              | 60 (14.0)    | <b>Atypical</b>   | 131 (30.5)   | <b>Number of Patients</b> | 105                 |
| <b>Other</b>                  | 7 (1.6)      | <b>Suspicious</b> | 43 (10.0)    |                           |                     |
| <b>Total Number Specimens</b> | 430          | <b>Positive</b>   | 24 (5.6)     |                           |                     |

270  
271  
272 **Associations between Cluster Metrics and Cytological Atypia on the Held-Out Test Set**

273 We implemented several Bayesian hierarchical models, fit using Markov Chain Monte Carlo  
274 methods <sup>29</sup>, to associate malignancy (whether specimen was deemed suspicious or positive) with  
275 the number of clusters, atypical clusters, and dense clusters (**see Appendix, section “Modeling**  
276 **Number and Type of Urothelial Clusters”**). We did not control for other potential confounders  
277 other than what was done through restriction of the final WSI set (detailed above). These models  
278 reported incidence rate ratios (*IRR*) and odds ratios (*OR*) and corresponding credible intervals  
279 (CI; similar to confidence interval) to describe the association between specimen atypia  
280 (suspicious or positive) and number/type of cell cluster. A CI greater than one indicates a  
281 positive relationship, whereas a CI less than one indicates a negative relationship. These CI were  
282 complemented by calculation of a “p-value”-like measure using the probability of direction, *pd*  
283 ( $p \approx 2 * (1 - pd)$ ) for reporting the existence of a positive/negative association. Model fitting  
284 was accomplished using the R v4.1 statistical language via the *brms* package <sup>30</sup>. *IRR/OR* were  
285 reported for different *minimum cell numbers* in order to understand how atypia associations  
286 varied by the size of the urothelial cell clusters considered.

287

## 288 **Results**

### 289 **Performance of Cell Border Detection Tool**

290 Overall, the cell border detection tool was able to delineate the boundaries of negative and  
291 atypical urothelial cells with moderately high accuracy (*accuracy*=0.75; Table 3). Dense regions  
292 of indistinguishable cell borders were also detected with good accuracy (*IoU*=0.66; an *IoU* of 0.5  
293 is considered good). However, there were instances where these dense regions were slightly  
294 overcalled (**Figure 2A,C,G,H**) and truncated (**Figure 1E, 2H**). Note in **Figure 2** instances where  
295 negative and atypical cells with distinct cell borders may have been folded into the dense regions  
296 (i.e., likely where regions were overcalled) and other instances where cells were nested in dense  
297 regions, suggesting the algorithm's potential to conflate two distinct yet ambiguous entities.  
298 While this occurred in several instances, overall, this cross-contamination was not a significant  
299 issue (*sensitivity*=0.95, *specificity*=0.84; **Table 3**). Performance statistics for squamous and  
300 leukocytes were not reported as they were filtered out via the cluster postprocessing step.

301

302 In determining the relationship to overall UC atypia, only cluster-level aggregate measures (i.e.,  
303 whether cluster harbors atypical cells or dense regions) are considered which do not require high  
304 fidelity pixelwise localization of the cell borders. Aggregate statistics of number of urothelial  
305 cells and dense regions were in excellent concordance with the ground truth annotations. The  
306 true and predicted number of urothelial cells in each cluster exhibited high correlation ( $r=0.89$ ;  
307 **Table 3**), as did the dense region areas reported across the internal test set clusters ( $r=0.91$ ;  
308 **Table 3**) (**Figure 3**). The cell border detection tool could accurately report on the presence of a  
309 urothelial cell cluster (i.e., number urothelial cells at least 3; C-Statistic=0.98), whether a cluster

310 harbors atypical cells (C-Statistic=0.81) or whether a cluster contains a dense region (C-  
 311 Statistic=0.98) (Table 3).

312

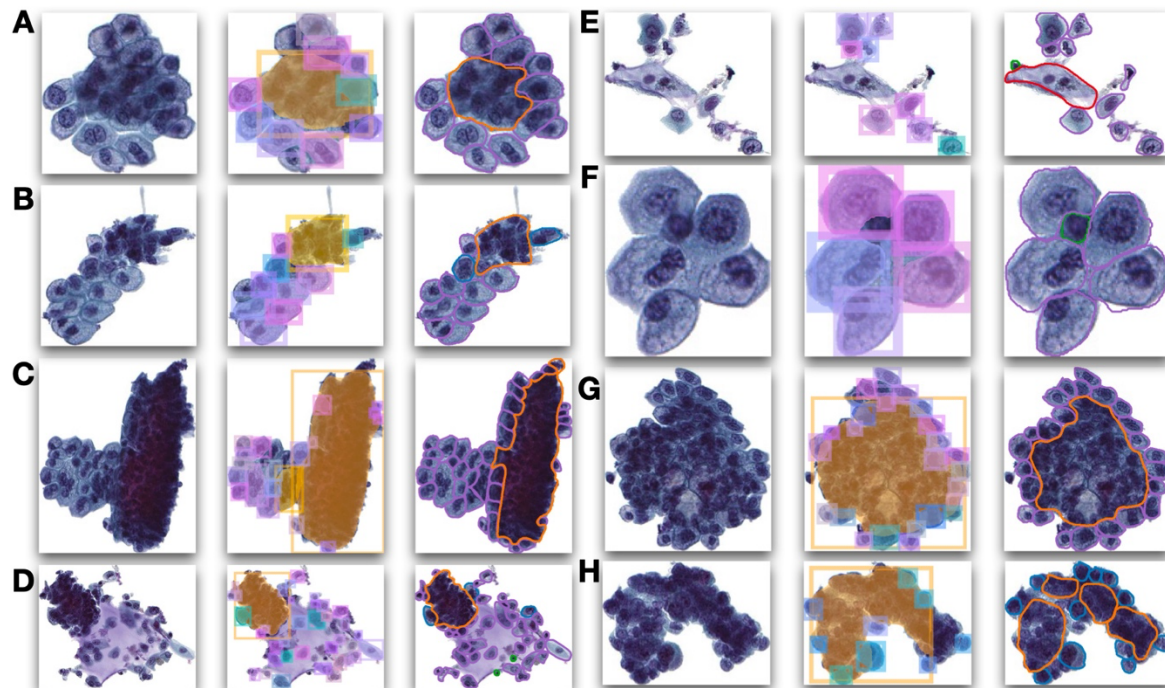

313 **Figure 2: Examples of internal test set urothelial cell clusters: A-H)** (left) original images;  
 314 (middle) cell border detection model predictions with slight color jitter to denote distinct cell  
 315 border predictions; squamous and inflammatory cells were removed from predictions during  
 316 postprocessing as they were not the focus of this workflow; (right) pathologist annotations  
 317  
 318

319 **Table 3: Performance metrics on internal test set of urothelial clusters**

| Metric               | Task                                                                                 | Measure      | Score | 2.5% CI | 97.5% CI |
|----------------------|--------------------------------------------------------------------------------------|--------------|-------|---------|----------|
| <b>Cell-Level</b>    | Urothelial Cell Boundary Localization                                                | Detection    | 0.75  | 0.71    | 0.81     |
|                      |                                                                                      | Recall       |       |         |          |
|                      | Dense Region Localization                                                            | Weighted IoU | 0.66  | 0.61    | 0.71     |
|                      | Urothelial Boundary vs Dense Region Assignment                                       | Detection    | 0.95  | 0.92    | 0.97     |
|                      |                                                                                      | Sensitivity  |       |         |          |
|                      |                                                                                      | Detection    | 0.84  | 0.75    | 0.92     |
|                      |                                                                                      | Specificity  |       |         |          |
| <b>Cluster-Level</b> | Urothelial Cell Cluster Detection (i.e., number urothelial cells at least 3)         | C-Statistic  | 0.98  | 0.96    | 0.99     |
|                      |                                                                                      | Spearman     | 0.89  | 0.83    | 0.95     |
|                      | Negative Urothelial Cell Cluster Detection                                           | C-Statistic  | 0.97  | 0.94    | 0.99     |
|                      | Atypical Urothelial Cell Cluster Detection                                           | C-Statistic  | 0.81  | 0.71    | 0.90     |
|                      | Dense Architecture Cell Cluster Detection (i.e., at least one dense region detected) | C-Statistic  | 0.98  | 0.95    | 0.997    |
|                      |                                                                                      | Spearman     | 0.91  | 0.85    | 0.95     |

320

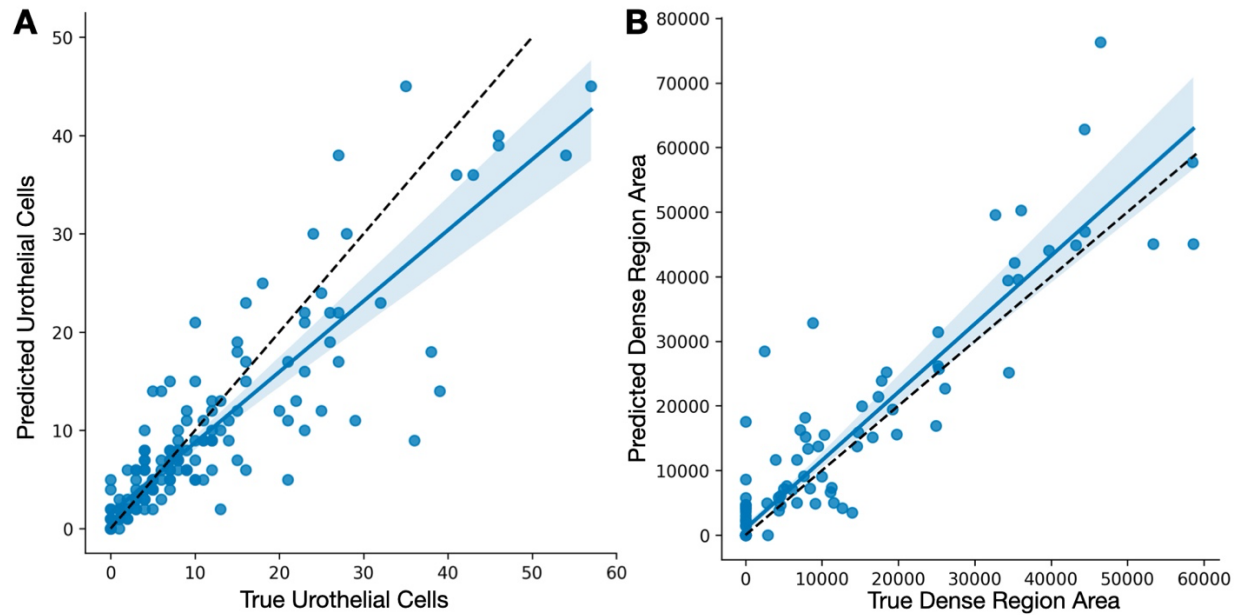

321  
322 **Figure 3: Scatterplots of aggregate true and predicted cluster statistics across internal test**  
323 **set clusters: A) counts of urothelial cells per cluster; B) area of dense regions within each cluster**  
324

325 **Associations with Overall UC Atypia**

326 Presence and number of urothelial clusters was positively associated with specimen atypia, as  
327 were the number of clusters containing atypical cells or harboring dense regions (**Table 4**;  
328 **Figure 4**). However, these associations were modulated by the size of the urothelial cell clusters  
329 (**Figure 4A**). In general, the relationship between the number of urothelial/negative clusters and  
330 UC atypia strengthened based on the size of cluster considered. For instance, number of  
331 urothelial clusters containing only one urothelial cell or above (*minimum cell number=1+*;  
332  $IRR=1.53$ ,  $95\%CI: [1.52-1.53]$ ,  $p<0.001$ ; **Table 4**) were less diagnostic for suspicious and  
333 positive as compared to number of clusters with 45 or more urothelial cells (*minimum cell*  
334 *number=45+*;  $IRR=3.43$ ,  $95\%CI: [2.42-4.82]$ ,  $p<0.001$ ; **Table 4**). Similarly, the number of  
335 atypical clusters containing only one urothelial cell or above (*minimum cell number=1+*;  
336  $OR=1.05$ ,  $95\%CI: [1.04-1.06]$ ,  $p<0.001$ ; **Table 4**) were relatively nondiagnostic for suspicious  
337 and positive, whereas considering clusters with 45 or more urothelial cells were far more  
338 diagnostic (*minimum cell number=45+*;  $OR=20.09$ ,  $95\%CI: [3.56-137.02]$ ,  $p<0.001$ ; **Table 4**).



339 The variance of the posterior credible interval of the effect estimates also changed based on the  
 340 number of cells considered for a cluster (**Figure 4A**) as fewer clusters per specimen could be  
 341 tabulated when more cells were required to call a cluster. There was a positive association  
 342 between urothelial clusters that contained dense regions of overlapping cells and UC atypia  
 343 (*minimum cell number=8+; OR=1.13, 95%CI: [1.07-1.19], p<0.001; Table 4*).

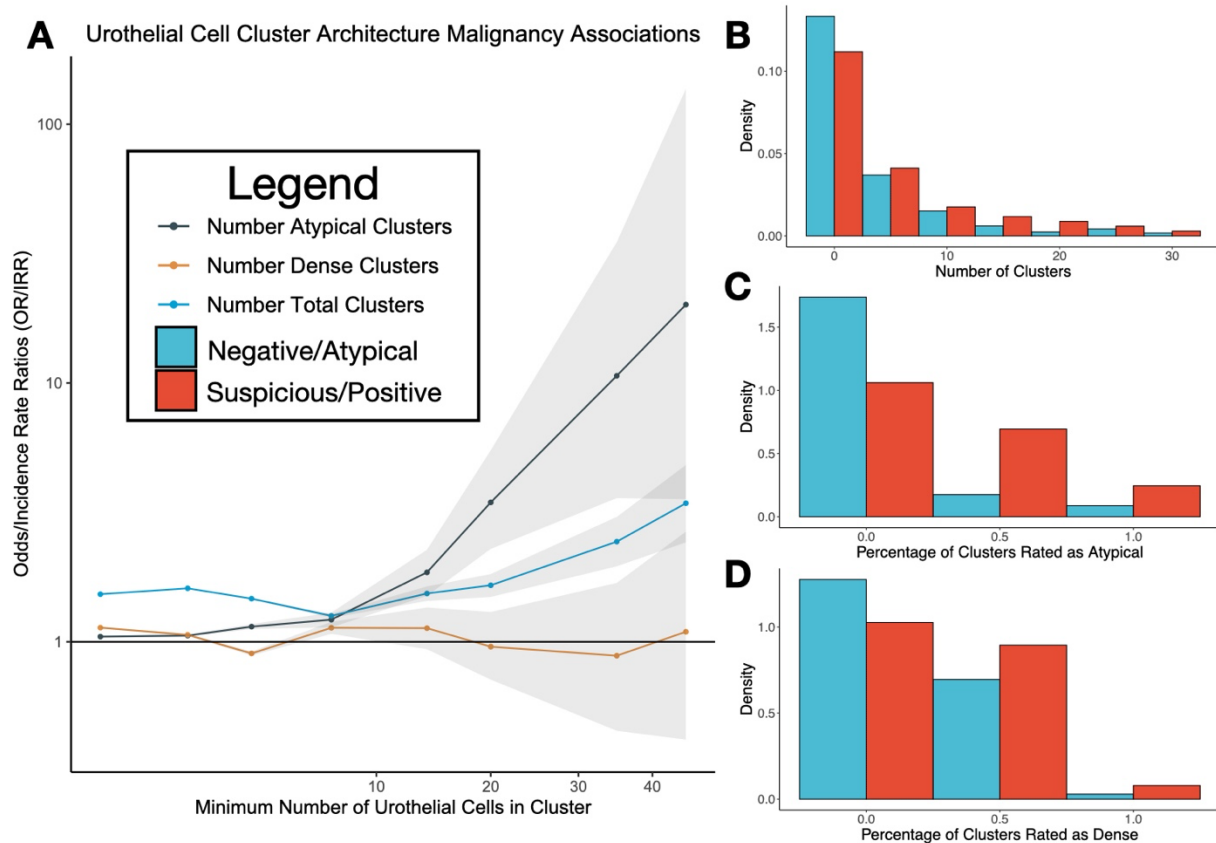

344 **Figure 4: Graphical display of urine atypia associations with urothelial cell clusters:** A) line  
 345 plot depicting odds ratios/incidence rate ratios between specimen atypia and number of  
 346 urothelial/atypical/dense clusters as a function of the minimum number of cells which form a  
 347 urothelial cluster for recording number of clusters across specimen; horizontal line indicates no  
 348 relationship ( $OR/IRR=1$ ); grey regions denote 95% uncertainty/credible interval; B) grouped  
 349 histogram normalized density plot of number of clusters per specimen versus whether specimen  
 350 was suspicious/positive (blue) or negative/atypical (red), counts tabulated across specimen; plot  
 351 was truncated to the right emphasize important relationships over outliers; demonstrates counts  
 352 of urothelial cells were depleted for suspicious/positive specimen as compared to  
 353 negative/atypical for lower number of cells and enriched at higher number of cells; *minimum cell*  
 354 *number* was 20 for this example; C) similar plot for percentage of clusters within specimen that  
 355 were rated as atypical; *minimum cell number* was 20 for this example; D) similar plot for  
 356 percentage of clusters within specimen that contained a dense region; *minimum cell number* was  
 357

358 7 for this example; note that **C-D**) are unweighted by the total number of urothelial clusters in  
 359 specimen

360  
 361 **Table 4: Reported associations between urine atypia and number and type of urothelial**  
 362 **clusters in specimen**; depicted are the odds ratios for number of atypical urothelial clusters and  
 363 number of dense urothelial clusters per specimen and incidence rate ratios for the total number of  
 364 urothelial clusters per specimen; also included are the 95% credible intervals and “p-values”;  
 365 results are reported by urothelial cluster size (*minimum cell number*)

| Type                            | Minimum Number of Urothelial Cells (i.e., Cluster Size) | OR/IRR | 2.5% CI | 97.5% CI | p      |
|---------------------------------|---------------------------------------------------------|--------|---------|----------|--------|
| <b>Number Atypical Clusters</b> | 1+                                                      | 1.05   | 1.04    | 1.06     | <0.001 |
|                                 | 2+                                                      | 1.06   | 1.05    | 1.07     | <0.001 |
|                                 | 4+                                                      | 1.14   | 1.12    | 1.17     | <0.001 |
|                                 | 8+                                                      | 1.22   | 1.14    | 1.30     | <0.001 |
|                                 | 15+                                                     | 1.86   | 1.51    | 2.27     | <0.001 |
|                                 | 21+                                                     | 3.46   | 2.29    | 5.49     | <0.001 |
|                                 | 36+                                                     | 10.66  | 3.59    | 34.99    | <0.001 |
|                                 | 46+                                                     | 20.09  | 3.56    | 137.02   | <0.001 |
| <b>Number Dense Clusters</b>    | 1+                                                      | 1.13   | 1.13    | 1.14     | <0.001 |
|                                 | 2+                                                      | 1.06   | 1.05    | 1.07     | <0.001 |
|                                 | 4+                                                      | 0.90   | 0.88    | 0.92     | <0.001 |
|                                 | 8+                                                      | 1.13   | 1.07    | 1.19     | <0.001 |
|                                 | 15+                                                     | 1.13   | 0.94    | 1.36     | 0.19   |
|                                 | 21+                                                     | 0.96   | 0.71    | 1.30     | 0.77   |
|                                 | 36+                                                     | 0.88   | 0.45    | 1.69     | 0.692  |
|                                 | 46+                                                     | 1.09   | 0.42    | 2.66     | 0.851  |
| <b>Number Total Clusters</b>    | 1+                                                      | 1.53   | 1.52    | 1.53     | <0.001 |
|                                 | 2+                                                      | 1.61   | 1.60    | 1.62     | <0.001 |
|                                 | 4+                                                      | 1.47   | 1.46    | 1.48     | <0.001 |
|                                 | 8+                                                      | 1.26   | 1.24    | 1.28     | <0.001 |
|                                 | 15+                                                     | 1.54   | 1.44    | 1.64     | <0.001 |
|                                 | 21+                                                     | 1.65   | 1.49    | 1.83     | <0.001 |
|                                 | 36+                                                     | 2.44   | 1.96    | 3.04     | <0.001 |
|                                 | 46+                                                     | 3.43   | 2.42    | 4.82     | <0.001 |

366

367

## 368 Discussion

369 This work sought to better comprehend the association between cytological atypia for urothelial

370 carcinoma and the number and type of urothelial cell clusters in voided urine specimens. While

371 previous works have explored associations between presence, number and type of urothelial cell

372 clusters and UC diagnoses, such studies were limited in nuanced exploration of these

373 associations as they lacked the flexibility of a computer-based digital assessment. Meanwhile,

374 existing computational methods for urine cytology do not clearly demarcate cellular boundaries

375 nor do they explicitly define dense overlapping cellular architecture. The current work makes use

376 of state-of-the-art deep learning methodologies to facilitate the incorporation of cluster atypia

377 and architecture into the cytomorphological slide assessment by counting urothelial cells of  
378 atypical morphologies and enumerating distinct architectures (i.e., dense regions).

379

380 The study findings indicate that the cell border detection tool could accurately locate urothelial  
381 cells and dense overlapping pockets of urothelial cells within the specimen while disregarding  
382 squamous and inflammatory cells, which is a challenging task, even for a person. When  
383 evaluating cell clusters across the cohort, we recapitulated and expanded previous study findings  
384 on the importance of clusters for cytological assessment. The study findings presented in this  
385 paper confirmed the importance of assessing cytological atypia within clusters, though suggested  
386 that evaluating larger clusters may be more diagnostic<sup>31-33</sup>. In concordance with previous  
387 findings, number of clusters within a specimen was found to be associated with specimen atypia,  
388 which may be reflective of the overall specimen cellularity. There exists ample literature  
389 documenting the effect of cellularity on specimen atypia<sup>2,4,34</sup>. Meanwhile, this study hinted at  
390 potential relationships between the cell cluster architecture (i.e., presence of dense regions),  
391 which has been the subject of debate in existing literature, though these relationships were not as  
392 strong as the number of urothelial/atypical clusters.

393

394 While the cell border detection tool developed in this study identified associations between  
395 urothelial cell clusters and specimen atypia, it was never intended to be utilized as a diagnostic  
396 decision aid, but rather was intended to be incorporated into a more comprehensive algorithm as  
397 a preprocessing tool. While this study suggests the role and importance of clusters for cytology  
398 assessment, clearly the assessment of single cells is also equally if not more valuable for the final  
399 determination. Taken together, digital analysis of both individual cells and urothelial clusters

400 may provide both efficient and reliable bladder cancer screening. However, there are several  
401 limitations to this study. For instance, this analysis was restricted to voided specimens prepared  
402 with ThinPrep®, and results may differ depending on the specimen type and preparation method.  
403 Other confounders and/or effect modifiers (e.g., age, sex, previous history of hematuria, stones,  
404 bladder cancer, biopsy results) may influence the associations explored in this study and warrant  
405 future exploration. As there were significantly fewer suspicious and positive diagnoses than  
406 atypical and negative, this could point to potential selection bias, especially since the number of  
407 atypical and dense clusters were only compared between groups for cases where the number of  
408 total urothelial clusters was greater than zero. Such cases were still included for findings based  
409 on number of clusters, although the number of clusters per specimen decreases as the minimum  
410 number of cells to call clusters increases (i.e., zero-inflated outcome). Findings were guided by  
411 evaluation using TPS, were done in research setting and did not incorporate information from the  
412 medical history and cytotechnologist prescreening, all of which may limit the external  
413 applicability of the study findings. Additionally, different cytopathologists may evaluate clusters  
414 differently, which presents a future area of exploration. There also exist other cell types which  
415 may have evaded assessment (e.g., seminal vesicle cells, glandular cells, etc.). Folding in  
416 atypical cells into dense clusters may also have impacted the final assessment. In some cases,  
417 pathologist annotations of the cell boundaries within clusters were coarse, which may have  
418 distorted reporting of the detection tool accuracy. Collecting additional training data and  
419 exploring new methods and other augmentation techniques present opportunities to improve the  
420 detection model.  
421

422 Over the past decade, urine cytology assessment criteria have become increasingly quantitative  
423 to resolve interobserver variability in atypical and suspicious cytology assignments. Reporting  
424 reliability and promptness, as well as disease management options may be further improved  
425 through assessment of all cells within the specimen, though manual assessment on this scale is  
426 currently intractable and unfeasible given the caseload. The preprocessing cell border  
427 identification/localization tool could serve as an important upstream step for a diagnostic  
428 decision support aid, which could operate on candidate urothelial cells extracted within clusters  
429 to provide reliable atypia estimates (e.g., precisely estimate NC ratio for confirmed urothelial  
430 cells within cluster).

431

## 432 **Conclusion**

433 Building a comprehensive understanding of the relevance of urothelial cell cluster atypia for  
434 cytological bladder cancer screening is a challenging task as it requires the precise localization of  
435 cell borders within complex cellular mixtures of varying overlap. For emerging digital diagnostic  
436 aids, assessment of clusters remains an ambiguous and *ad hoc* accompaniment to single cell  
437 analysis. This study sought to develop a deep learning-based preprocessing tool for separating  
438 cell borders and where appropriate, registering the presence and location of dense, highly cellular  
439 architectures. While the current study pointed to associations between cluster atypia and  
440 urothelial carcinoma, we plan to incorporate the cell border detection tool into a digital workflow  
441 for rapid bladder cancer screening to investigate the degree to which such a tool can augment  
442 clinical decision making.

443

444

445 **References**

- 446 1. Barkan, G. A. *et al.* The Paris System for Reporting Urinary Cytology: The Quest to Develop  
447 a Standardized Terminology. *ACY* **60**, 185–197 (2016).
- 448 2. Bostwick, D. G. 7 - Urine Cytology. in *Urologic Surgical Pathology (Fourth Edition)* (eds.  
449 Cheng, L., MacLennan, G. T. & Bostwick, D. G.) 322-357.e7 (Elsevier, 2020).  
450 doi:10.1016/B978-0-323-54941-7.00007-4.
- 451 3. Wang, Y.-H. *et al.* Diagnostic Agreement for High-Grade Urothelial Cell Carcinoma in  
452 Atypical Urine Cytology: A Nationwide Survey Reveals a Tendency for Overestimation in  
453 Specimens with an N/C Ratio Approaching 0.5. *Cancers* **12**, 272 (2020).
- 454 4. Barkan, G. A. Enough is enough: adequacy of voided urine cytology. *Cancer Cytopathology*  
455 vol. 124 163–166 (2016).
- 456 5. Roy, M. *et al.* An institutional experience with The Paris System: A paradigm shift from  
457 ambiguous terminology to more objective criteria for reporting urine cytology.  
458 *Cytopathology* **28**, 509–515 (2017).
- 459 6. Deshpande, V. & McKee, G. T. Analysis of atypical urine cytology in a tertiary care center.  
460 *Cancer Cytopathology* **105**, 468–475 (2005).
- 461 7. Mokhtar, G. A., Al-Dousari, M. & Al-Ghamedi, D. Diagnostic significance of atypical  
462 category in the voided urine samples: A retrospective study in a tertiary care center. *Urol*  
463 *Ann* **2**, 100–106 (2010).
- 464 8. Glass, R. *et al.* Analysis of the cytomorphological features in atypical urine specimens  
465 following application of the Paris system for reporting urinary cytology. *Acta Cytologica* **62**,  
466 54–61 (2018).
- 467 9. Onur, I., Rosenthal, D. L. & VandenBussche, C. J. Benign-appearing urothelial tissue  
468 fragments in noninstrumented voided urine specimens are associated with low rates of  
469 urothelial neoplasia. *Cancer Cytopathology* **123**, 180–185 (2015).
- 470 10. Chandler, J. B., Colunga, M., Celli, R., Lithgow, M. Y. & Baldassarri, R. J. Applicability of  
471 the Paris System for veterans: high rates of undiagnosed low-grade urothelial neoplasia.  
472 *Journal of the American Society of Cytopathology* **10**, 357–365 (2021).
- 473 11. Wolfson, W. L. & Rosenthal, D. L. Cell clusters in urinary cytology. *Acta Cytol* **22**, 138–141  
474 (1978).
- 475 12. Brimo, F. *et al.* Accuracy of urine cytology and the significance of an atypical category. *Am*  
476 *J Clin Pathol* **132**, 785–793 (2009).
- 477 13. Sanghvi, A. B., Allen, E. Z., Callenberg, K. M. & Pantanowitz, L. Performance of an  
478 artificial intelligence algorithm for reporting urine cytopathology. *Cancer Cytopathology*  
479 **127**, 658–666 (2019).
- 480 14. Vaickus, L. J., Suriawinata, A. A., Wei, J. W. & Liu, X. Automating the Paris System for  
481 urine cytopathology—A hybrid deep-learning and morphometric approach. *Cancer*  
482 *Cytopathology* **127**, 98–115 (2019).
- 483 15. Awan, R. *et al.* Deep learning based digital cell profiles for risk stratification of urine  
484 cytology images. *Cytometry A* **99**, 732–742 (2021).
- 485 16. Kaneko, M. *et al.* Urine cell image recognition using a deep-learning model for an automated  
486 slide evaluation system. *BJU Int* (2021) doi:10.1111/bju.15518.
- 487 17. Granados, R., Duarte, J. A., Corrales, T., Camarmo, E. & Bajo, P. Applying the Paris System  
488 for Reporting Urine Cytology Increases the Rate of Atypical Urothelial Cells in Benign  
489 Cases: A Need for Patient Management Recommendations. *Acta Cytol* **61**, 71–76 (2017).

- 490 18. McAlpine, E. D., Pantanowitz, L. & Michelow, P. M. Challenges Developing Deep Learning  
491 Algorithms in Cytology. *ACY* **65**, 301–309 (2021).
- 492 19. Landau, M. S. & Pantanowitz, L. Artificial intelligence in cytopathology: a review of the  
493 literature and overview of commercial landscape. *Journal of the American Society of*  
494 *Cytopathology* **8**, 230–241 (2019).
- 495 20. Nojima, S. *et al.* A deep learning system to diagnose the malignant potential of urothelial  
496 carcinoma cells in cytology specimens. *Cancer Cytopathology* **129**, 984–995 (2021).
- 497 21. Jiang, H. *et al.* Deep Learning for Computational Cytology: A Survey. *arXiv:2202.05126*  
498 *[cs, eess]* (2022).
- 499 22. Levy, J. J. & Vaickus, L. J. Artificial Intelligence in Anatomic Pathology. *Advances in*  
500 *Molecular Pathology* **4**, 145–171 (2021).
- 501 23. Cheng, B. *et al.* Panoptic-DeepLab: A Simple, Strong, and Fast Baseline for Bottom-Up  
502 Panoptic Segmentation. *arXiv:1911.10194 [cs]* (2020).
- 503 24. Kirillov, A., He, K., Girshick, R., Rother, C. & Dollar, P. Panoptic Segmentation. in 9404–  
504 9413 (2019).
- 505 25. Ren, S., He, K., Girshick, R. & Sun, J. Faster r-cnn: Towards real-time object detection with  
506 region proposal networks. *Advances in neural information processing systems* **28**, (2015).
- 507 26. Lin, T.-Y. *et al.* Feature pyramid networks for object detection. in *Proceedings of the IEEE*  
508 *conference on computer vision and pattern recognition* 2117–2125 (2017).
- 509 27. Wu, Y., Kirillov, A., Massa, F., Lo, W.-Y. & Girshick, R. Detectron2. (2019).
- 510 28. Bodla, N., Singh, B., Chellappa, R. & Davis, L. S. Soft-NMS—improving object detection  
511 with one line of code. in *Proceedings of the IEEE international conference on computer*  
512 *vision* 5561–5569 (2017).
- 513 29. Homan, M. D. & Gelman, A. The No-U-turn sampler: adaptively setting path lengths in  
514 Hamiltonian Monte Carlo. *J. Mach. Learn. Res.* **15**, 1593–1623 (2014).
- 515 30. Bürkner, P.-C. brms: An R Package for Bayesian Multilevel Models Using Stan. *Journal of*  
516 *Statistical Software* **80**, 1–28 (2017).
- 517 31. Wojcik, E. M. What should not be reported as atypia in urine cytology. *Journal of the*  
518 *American Society of Cytopathology* **4**, 30–36 (2015).
- 519 32. Thiryayi, S. A. & Rana, D. N. Urine cytopathology: challenges, pitfalls, and mimics.  
520 *Diagnostic Cytopathology* **40**, 1019–1034 (2012).
- 521 33. Owens, C. L., Vandenbussche, C. J., Burroughs, F. H. & Rosenthal, D. L. A review of  
522 reporting systems and terminology for urine cytology. *Cancer Cytopathol* **121**, 9–14 (2013).
- 523 34. Brisuda, A., Háček, J., Čechová, M., Škapa, P. & Babjuk, M. Clinical and cytopathological  
524 factors affecting the cellularity of urinary cell blocks and the implication for diagnosis and  
525 follow-up of urinary bladder urothelial carcinoma. *Cytopathology* **29**, 537–544 (2018).
- 526
